# Supplementary material for: Verification and Calibration of a Commercial Anisotropic Magnetoresistive Magnetometer by Multivariate Non-linear Regression
Source: Copernicus journal article supplement (doi:10.5194/egusphere-2023-588), 2023-03-29
Supplement: Supplementary file [file egusphere-2023-588-AC1-supplement.pdf]

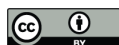

# Verification and Calibration of a Commercial Anisotropic Magnetoresistive Magnetometer by Multivariate Non-linear Regression

Nicholas Belsten<sup>1</sup>, Mary Knapp<sup>2</sup>, Rebecca Masterson<sup>1</sup>, Cadence Payne<sup>1</sup>, Kristen Ammons<sup>1</sup>, Frank D. Lind<sup>2</sup>, and Kerri Cahoy<sup>1</sup>

<sup>1</sup>Department of Aeronautics and Astronautics, Massachusetts Institute of Technology, Cambridge, MA 02139 USA.

<sup>2</sup>Haystack Observatory, Massachusetts Institute of Technology, 99 Millstone Rd, Westford, MA 01886 USA.

**Correspondence:** Nicholas Belsten (nbelsten@mit.edu)

## Abstract.

Commercially available anisotropic magnetoresistive (AMR) magnetometers exhibit order 1 nano-Tesla (nT) sensitivity in small size, weight, and power (SWaP) packages. However, AMR magnetometer accuracy is diminished by properties such as static offsets, gain uncertainty, cross-axis coupling, and temperature effects. This work presents a measurement of the magnitude of these effects for a Honeywell HMC1053 magnetometer and evaluates a method for calibrating the observed effects by multivariate non-linear regression using a 27 parameter measurement equation.

The presented calibration method has reduced the vector norm of the root mean square error from 4.3  $\mu\text{T}$  to 0.072  $\mu\text{T}$  for the data acquired in this experiment. This calibration method has been developed for use on the AERO-VISTA CubeSat missions, but the methods and results may be applicable to other resource constrained magnetometers whose accuracies are limited by the offset, gain, off-axis, and thermal effects similar to the HMC1053 AMR magnetometer.

## 1 Background

### 1.1 Satellite magnetic sensing

Magnetic sensing is used on satellites for orientation determination in Low Earth Orbit (LEO) and for scientific observations of planetary bodies and solar wind (Albertson and Van Baelen, 1970). Earth's surface magnetic field is dominated by the dipolar mode (or component), but spherical expansion representations of Earth's magnetic field can define global magnetic maps which achieve vector component accuracies of about 150 nT and angular accuracies of about 1°. Such maps include the World Magnetic Map (Chulliat et al., 2020) and the International Geomagnetic Reference Field (IGRF) (Alken et al., 2021). If a satellite magnetometer can achieve similar measurement accuracy, then the magnetic attitude determination accuracy will be primarily limited by map models and not magnetic sensing. This level of accuracy would enable magnetic-only attitude determination and control, in which a satellite senses orientation with a vector magnetometer, and controls spacecraft orientation without the use of reaction wheels or control thrusters and instead uses only magnetorquers for actuation (Liu et al., 2016).

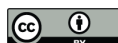

Additionally, magnetometers are used for scientific observation of solar system bodies, solar wind, and other space weather events (Albertson and Vaelen, 1970). Satellite-borne magnetometers provide information about planetary geology by measuring the magnitude, orientation, and variation of an object's magnetic field (Jr and man, 2002). On solar system objects without an internally generated dynamo field, the crustal remnant magnetic fields still provide information on the body's history and composition (Sonett et al., 1967). Magnetic field observations are also used to learn about the space plasma environment such as the connection between planetary magnetic fields and solar coronal activity (Nicollier and Bonnet, 2016).

## 1.2 AMR magnetometers

Materials with magnetoresistance exhibit a variation in electrical resistance with incident magnetic field. Some materials exhibit a sub-type of magnetoresistance in which the change in resistance depends also on direction of the applied magnetic field, not just the magnitude (Gu et al., 2013). Anisotropic Magnetoresistive (AMR) magnetometers utilize this effect by converting the change in material resistance into a measurement of the direction of the applied magnetic field. With a 4-element Wheatstone bridge configuration of AMR material, AMR magnetometers produce an analog output approximately proportional to one vector direction of the magnetic field (Ripka et al., 2003). This configuration is used by the Honeywell HMC-series discussed in this work.

The AMR materials in an AMR magnetometer can be deposited as a thin film on silicon and therefore integrated into small electrical components, with dimensions on the order of a few mm per side. Furthermore, these packages can contain three perpendicular devices that enable simultaneous and independent measurement of three orthogonal magnetic field vector components. Such components that integrate three-axis AMR sensing into one unit include the Honeywell HMC1053 and the Memsc MMC5603MJ. The Honeywell HMC1053 was selected for study in this work and use on the AERO-VISTA CubeSats for properties such as: low electrical noise due to analog design and steady state operation, low SWaP, and component family flight heritage on similar CubeSats such as ANDESITE (Ad-hoc Network Demonstration for Spatially Extended Satellite-based Inquiry and Other Team Endeavors) as described by Parham et al. (2019) and CINEMA (Cubesat for Ion, Neutral, Electron, Magnetic fields) as described by Archer et al. (2015).

## 1.3 Motivation

The AERO (Auroral Emission Radio Observer) and VISTA (Vector Interferometry Space Technology using AERO) missions use two low Earth orbit 6U CubeSats to perform scientific observation of radio emissions from the Earth's aurora and other HF signals at radio frequencies from 100 kHz to 15 MHz (Erickson et al., 2018; Lind et al., 2019). To contextualize the radio frequency measurements, the AERO and VISTA spacecraft will also contain low-SWaP (Size, Weight and Power) magnetometers with accuracy better than 100 nT (Belsten, 2022). These magnetometers will measure auroral current systems as the spacecraft passes through, providing scientific context for the radio frequency observations gathered by the radio frequency vector sensor antenna. The precision and noise floor of the HMC1053 magnetometer analyzed in this work meets the mission measurement requirements, but the manufacturer datasheet also reports inaccuracies due to a number of effects including

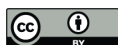

55 temperature dependence, cross-axis coupling, constant offsets, uncertain gains, and non-linearity. This work evaluates the accuracy performance of the AERO-VISTA AMR sensing device when calibrated for these expected effects.

#### 1.4 Comparison to previous works

Previous works by Archer et al. (2015) and Parham et al. (2019) have verified the capabilities of the CoTS AMR technology and also fit calibration coefficients for parameters such as angular offset, gain uncertainty, and temperature dependence of offset. The work by Archer et al. fits calibration coefficients for gain, offset, and angular position using on-orbit magnetometer data and the IGRF as a reference. Work by Parham et al. evaluates the gain, offset, and temperature coefficient of Honeywell HMC1001 and HMC1002 magnetometers using ground-based testing. This work describes the collection of ground data sufficient to derive calibration coefficients for gain, offset, cross-axis coupling as well as temperature coefficients for all terms. This work verifies the findings of the previous works within our noise limited fidelity ~~about~~ 20 nT, and applies previous CubeSat AMR magnetometer verification and calibration efforts to the HMC1053 magnetometer implementation for the AERO-VISTA mission. Finally, the non-linear calibration equation in this work includes second order couplings such as the temperature coefficients of cross-axis terms and temperature coefficients of offsets.

## 2 Methods

The performance of the magnetometer or device under test (DUT) has been evaluated by simultaneously exposing ~~the~~ both the DUT and a reference magnetometer to a variety of magnetic fields and temperatures.

### 2.1 Test hardware

An Engineering Development Unit (EDU) for the AERO-VISTA magnetic sensing instrument was developed for this calibration experiment. The electronics in the EDU amplify, digitize, timestamp, and store the signals from the magnetometer and have been described in previous work (Belsten et al., 2022). A MEDA FVM400 magnetometer is used as a ground-truth magnetic measurement reference. A 3D printed mechanical mount for the EDU constrains the DUT in space at about 1 cm distance to the reference magnetometer ~~(a Meda FVM400)~~. By keeping separation between the magnetic sensing instruments and any magnetized source, magnetic gradients are minimized such that the magnetic field at the DUT is the same as at the reference magnetometer to within the expected accuracy of the DUT (order 10 nT).

For all experimentation, the Meda FVM400 reference magnetometer is assumed to be a zero-error ground truth measurement. It is possible that some effects fit by the calibration model are actually characteristics of the reference magnetometer and not the DUT, but assuming that all error belongs to the DUT and not the reference magnetometer is a conservative bounding assumption for analysis of the DUT.



### 2.1.1 Magnetometer configuration and operation

The amplified analog signal from the HMC1053 is digitized at 20 samples per second (SPS). The analog-to-digital converter (ADC) contains a single ADC circuit with an 8-channel multiplexer so the three axes and the temperature sensor are read sequentially. The duration of all sequential conversions results in a total effective sample period of 0.4 seconds. The HMC1053 magnetometer includes a set/reset polarity inversion functionality to correct for large offsets and to reduce hysteresis effects (Ripka et al., 2003). This switching offset calibration operation is used during data collection for this work as described for the AERO-VISTA engineering and flight models in previous work by Belsten et al. (2022). Therefore, it is only the offsets remaining after the set/reset polarity inversion that are considered in our calibration method (discussed in Section 3).

The FVM400 reference magnetometer samples at 4 samples per second. The magnetic measurement data from the two magnetometers are compared using interpolation to the 4 SPS rate of the reference magnetometer. The effects of any sampling offset in time are discussed in Section 2.2.

## 2.2 Test environment

All testing reported in this work was performed in a unshielded magnetically controlled room. This facility achieves near-zero and spatially uniform magnetic fields; however, environmental noise with large spatial scale outside the room is not blocked. Typical magnetic noise in this facility exhibits a peak-to-peak amplitude of  $0.3 \mu\text{T}$  and with most power at frequencies below 1 Hz (Belsten, 2022). The test and reference magnetometers operate simultaneously to within the resolution of the sample periods; therefore, environmental variation on timescales slower than the about 0.5 second sample period will not affect the measurement comparison. A measurement simultaneously showing uncalibrated test magnetometer (DUT) and reference magnetometer measurements of the environmental magnetic noise is shown in Figure 1a.

## 2.3 Data collection and performance verification

Using the hardware described in Section 2.1, the magnetic errors of the DUT due to non-ideal effects have been measured. We use the magnitude of these impacts to determine which non-ideal effects need to be included in the calibration model in Section 3. Data was collected in lab to evaluate the effect of each anticipated source of inaccuracy:

- Constant offset in each axis
- Gain error in each axis
- Cross-axis coupling
- Temperature dependence of each of the above parameters
- Hysteresis
- Non-linearity



**Table 1.** Average offset fit for each axis and residual root mean square (RMS) error

| Axis | Average delta ( $\mu\text{T}$ ) | RMS delta minus offset ( $\mu\text{T}$ ) |
|------|---------------------------------|------------------------------------------|
| X    | 0.328                           | 0.013                                    |
| Y    | 0.034                           | 0.024                                    |
| Z    | -0.467                          | 0.018                                    |

**Table 2.** Gain calibration coefficients for X, Y, and Z axes as determined by linear fit during single axis incident field tests.

| Axis | Gain calibration coefficient |
|------|------------------------------|
| X    | 1.095                        |
| Y    | 1.120                        |
| Z    | 1.115                        |

### 2.3.1 Constant offset

The constant offset was tested by placing the measurement device in the low-magnetic field room (minimizing the effects of gain uncertainty) and collecting simultaneous data for two minutes. The raw measured field is reported in Figure 1a; the average offset for each axis is subtracted from the DUT measurement and shown in Figure 1b; the offset variation in time is shown in Figure 1c; the residual difference after the average offset is subtracted is shown in Figure 1d. The average difference between each axes measurement and the root mean square (RMS) residual error is reported in Table 1.

### 2.3.2 Single axis applied field

A single axis applied field experiment was conducted for each orthogonal orientation in which the incident magnetic field was stepped from  $-50 \mu\text{T}$  to  $50 \mu\text{T}$ . Regression to the data collected in these experiments finds the gain calibration coefficients reported in Table 2. The data collected in these experiments is also used to determine the cross-axis coupling in the full calibration model described in Section 3. Additionally, by stepping these measurements through several increments during testing we have screened for non-linearity in the magnetometer as seen in Figure 2. The measurements and calibrations demonstrated in Figure 2 were repeated for the Y and Z axes. All three axes show a flat calibrated line once the linear calibration is applied, indicating that instrument does not exhibit observable non-linearity within the measurement noise floor.

The cross-axis effects are analyzed with the data collected during the single axis measurements. Some cross-axis coupling is expected due to residual misalignment of the magnetic field inducing coil with the magnetic field measurement system. However, this alignment error is the same for the test and reference magnetometers so the differences between the test and

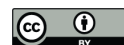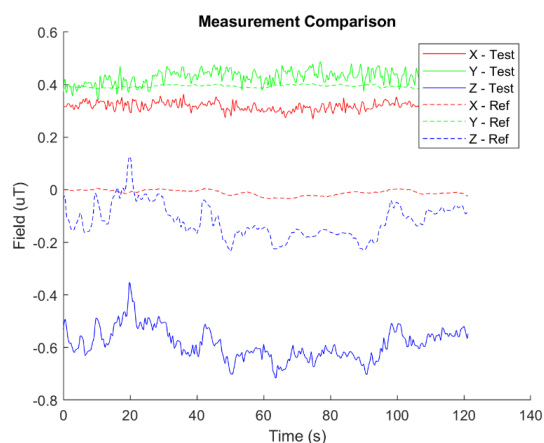

(a) Simultaneous raw measurements from the test and reference magnetometers.

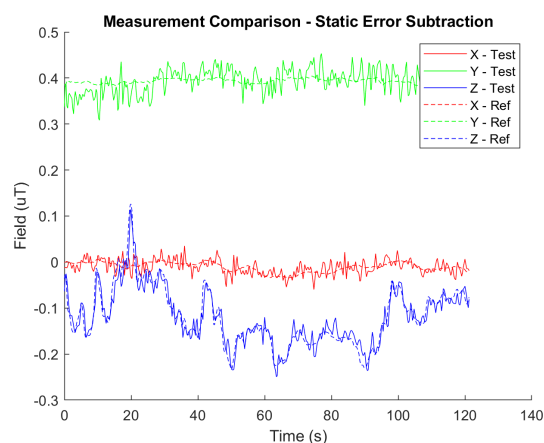

(b) Data from (a) but with the constant offset subtraction applied to the test magnetometer data

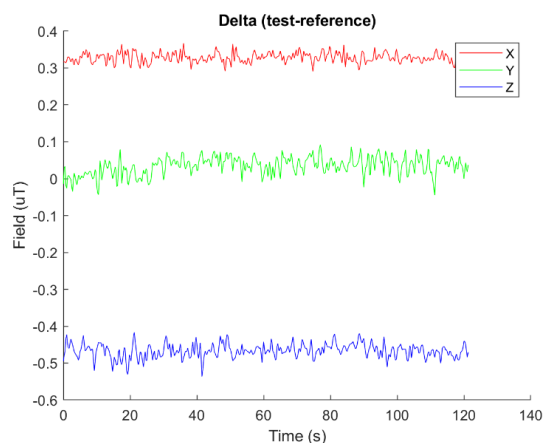

(c) The difference (delta) between the raw test and reference magnetometer over time

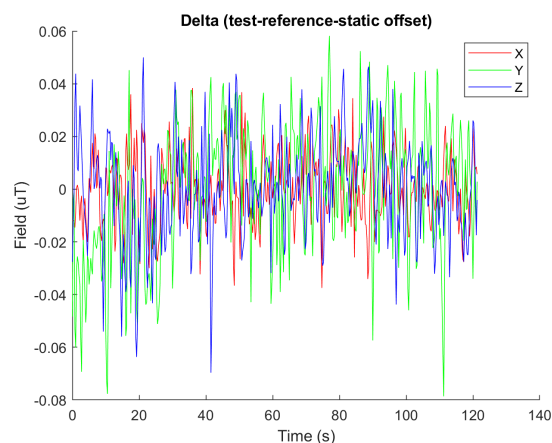

(d) The delta between the test and reference magnetometer measurement with the static offset subtracted

**Figure 1.** Evaluation of the magnetometer constant offset using a near-static magnetic field. The simple offset calibration calibrates to the noise floor for the data collected in this location as seen in the flat profile in c and d.

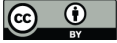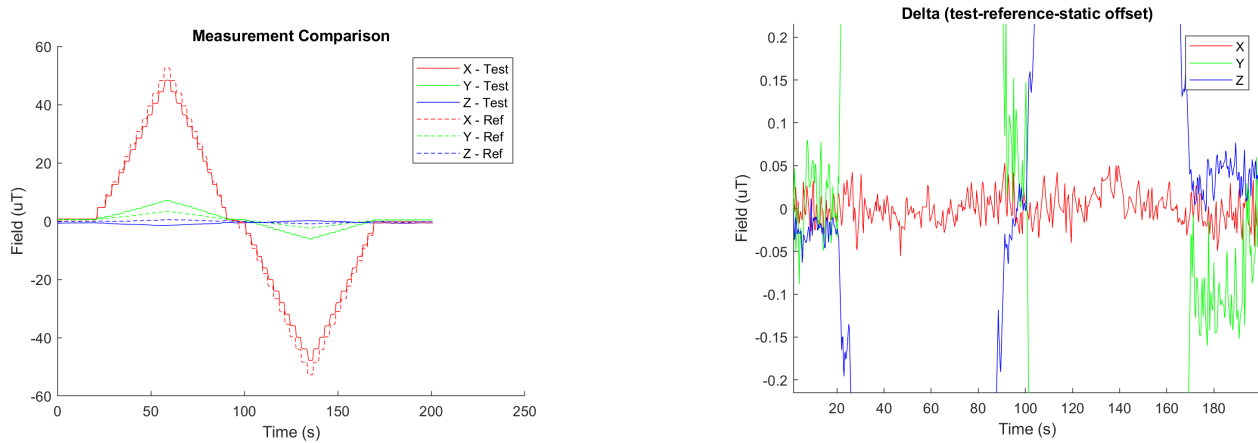

(a) Non calibrated magnetic measurements while stepping the X-axis applied field.

(b) Data from (a) with a linear fit to offset and gain. Y-axis zoomed to see flatness of calibrated X profile.

**Figure 2.** Data capture for evaluation of gain and linearity of the X-axis. The data in (a) is calibrated using a linear slope and offset fit. The flatness of the calibrated curve in (b) indicates that linearity errors are not observable with the current noise floor.

**Table 3.** Cross-axis coupling coefficients with single-axis gain coefficients on the diagonal. Adapted from (Belsten, 2022).

| Incident \ Affected |        |        |         |
|---------------------|--------|--------|---------|
|                     | X      | Y      | Z       |
| X                   | 1.0949 | 0.0939 | -0.0342 |
| Y                   | 0.0477 | 1.1200 | -0.0703 |
| Z                   | 0.0165 | 0.0317 | 1.1150  |

reference magnetometers contain information about the cross-axis couplings of the magnetometers themselves, assumed to be inherent to the DUT. The fit to the cross-axis coupling is reported in Table 3

### 2.3.3 Temperature effects

In this test, the circuit board with the DUT was heated to about 65 Celsius and allowed to cool to steady state—approximately a 30 degree Celsius temperature range—while capturing magnetic field data. During this experiment a constant magnetic field was applied along the X-axis to evaluate the change in gain coefficient due to temperature change. The measured fields over temperature are reported in Figure 3. The linear fit to the X-axis data pictured derives a linear temperature coefficient of 4.37 nT per degree C.

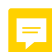

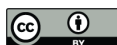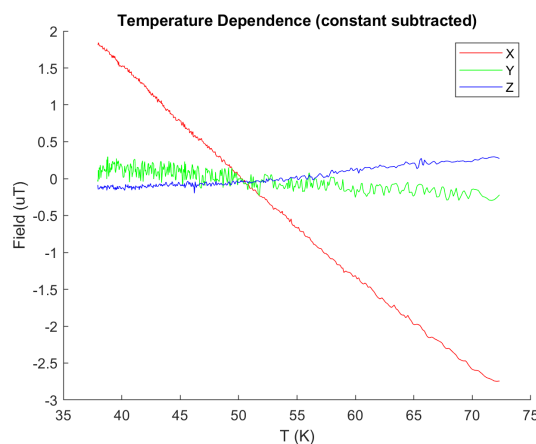

**Figure 3.** Temperature variation with a magnetic field applied along the X-axis primarily shows along-field measurement variation, but variation is also observed to a lesser degree in the cross-axes.

### 2.3.4 Hysteresis

Hysteresis effects are difficult to calibrate as they require knowledge of past states of the magnetic environment. The magnitude of hysteresis effects were measured by applying the maximum expected incident magnetic field—which in the case of AERO-VISTA is set by magnetometer proximity to the spacecraft magnetorquers and is  $150\ \mu\text{T}$ . This maximum field is applied in the positive and negative directions; the difference between the reported magnetic field when no magnetic field is applied after the negative maximum field compared to after the positive maximum field estimates a worst case error due to hysteresis. The data collected for this test is shown in Figure 4. The reference magnetometer shows about  $0.47\ \mu\text{T}$  of remanent field difference and the test magnetometer shows an additional  $50\ \text{nT}$  of remanent field. Given that both magnetometers reported similar hysteresis effects, the source of the hysteresis is likely magnetization of material near both magnetometers and not an effect inherent to either magnetometer alone. This observation indicates the need to maintain magnetic cleanliness close to the magnetometer.

## 2.4 Summary of observed accuracy effects

Table 4 summarizes the error magnitude of each of the effects analyzed. Where there may be multiple instances of such a measurement (multiple axes for example) only the the worst-case value from the measurements in Section 2.3 are reported in Table 4.

### 2.4.1 Second order terms

Table 4 reported each of the major interfering terms but did not consider the combination of multiple effects (e.g. how the static offset varies with temperature). The effect of second order terms was estimated by combining their fractional effect



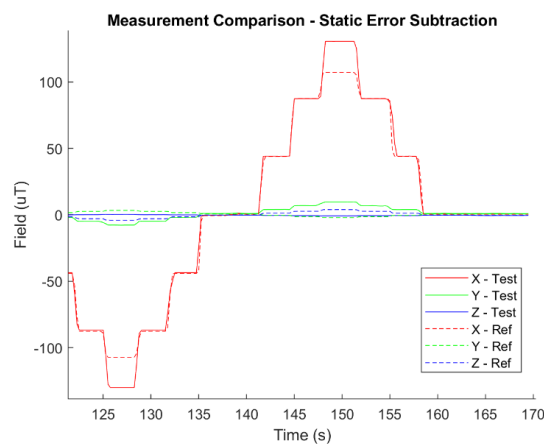

**Figure 4.** Positive and negative 150  $\mu\text{T}$  magnetic field excursion is used to screen for hysteresis effects.

**Table 4.** Summary of measured non-ideal properties. Adapted from (Belsten, 2022).

| Effect                  | Value               | Is Calibration Included in Section 3? |
|-------------------------|---------------------|---------------------------------------|
| Noise                   | 24 nT RMS           | NA <sup>1</sup>                       |
| Gain                    | 5.86 $\mu\text{T}$  | Yes                                   |
| Static Offset           | 444 nT              | Yes                                   |
| Linearity               | <20 nT <sup>2</sup> | No                                    |
| Temperature Sensitivity | 10.9 $\mu\text{T}$  | Yes                                   |
| Hysteresis              | 50 nT               | No                                    |
| Cross-Axis              | 4.7 $\mu\text{T}$   | Yes                                   |

<sup>1</sup> Calibration is not applicable to noise.

<sup>2</sup> Linearity was not observed within the noise floor of this experiment.

compared to the full scale measurement. The largest first order effects from Table 4 are combined to estimate the contribution as reported in Table 5.

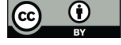

**Table 5.** Second-order non-ideal effects as evaluated by combining the fractional contribution of each first-order effect. Adapted from (Belsten, 2022).

| Effect                  | Static Offset | Gain            | Temperature Sensitivity | Cross-Axis      |
|-------------------------|---------------|-----------------|-------------------------|-----------------|
| Static Offset           | -             | NA <sup>1</sup> | 97 nT                   | NA <sup>1</sup> |
| Gain                    | -             | -               | 1.3 μT                  | 0.55 μT         |
| Temperature Sensitivity | -             | -               | -                       | 1.02 μT         |
| Cross-Axis              | -             | -               | -                       | -               |

<sup>1</sup> The static offset contribution has no applied-field dependence.

### 3 Calibration

This work extends the calibration equation reported in work by Archer et al. (2015) (Eq. 1) by including parameters for linear drift of all gain and offset parameters with temperature. This equation can also be built by combination of the individual linear fits described in Section 2.3 and summarized in Tables 4 and 5.

$$\vec{B}_{act} = [\mathbf{S} + \mathbf{K}_S * T] * \vec{B}_{meas} + [\vec{O} + \vec{K}_O * T] \quad (1)$$

The parameters in Eq. 1 are defined in Table 6. The calibration is applied by using the reference magnetometer data as  $\vec{B}_{act}$  and the test magnetometer data as  $\vec{B}_{meas}$ . Regression is applied on the thousands of data points collected across incident magnetic field and temperature conditions. The results shown in this work have used the MATLAB fitnlm function to implement non-linear regression with a separate 9-element model for every fit parameter; however, the model is easily implemented with other nonlinear regression fitting functions in other languages such as Python's scipy.optimize.least\_squares. Once the parameters are found, they can be used to find the calibrated magnetic field  $\vec{B}_{act}$  for future measured fields  $\vec{B}_{meas}$  simply by solving the equation algebraically.

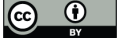

**Table 6.** Terms in the measurement equation (Eq. 1)

| Term             | Type   | Description                                                                                                                    |
|------------------|--------|--------------------------------------------------------------------------------------------------------------------------------|
| $\vec{B}_{act}$  | Vector | The real magnetic field at the measurement location                                                                            |
| $\mathbf{S}$     | Matrix | The sensitivity matrix which scales the signal based on the real sensitivity of each axis and includes linear off-axis effects |
| $\mathbf{K}_S$   | Matrix | The linear temperature dependence of each of the terms in the sensitivity matrix                                               |
| $T$              | Scalar | Temperature of the sensor                                                                                                      |
| $\vec{B}_{meas}$ | Vector | The raw three-axis measurement from the magnetometer                                                                           |
| $\vec{O}$        | Vector | An offset value for each axis                                                                                                  |
| $\vec{K}_O$      | Vector | The temperature dependence of the offset                                                                                       |

### 170 3.1 Calibration result

The fit of the calibration equation has been evaluated by applying the entire calibration model to all data collected in the determination of the non-ideal effects as described in Section 2.3 (except the hysteresis measurement data which saturated the reference magnetometer). The results of this regression are provided in Table 7.

**Table 7.** Derived regression coefficients. Units of °C and  $\mu\text{T}$

| Axis     | $S_x$  | $S_y$  | $S_z$  | $K_{Sx}$ | $K_{Sy}$ | $K_{Sz}$ | $\vec{O}$ | $\vec{K}_O$ | RMSE   |
|----------|--------|--------|--------|----------|----------|----------|-----------|-------------|--------|
| <b>X</b> | 1.026  | -0.163 | -0.211 | 0.0032   | 0.0047   | 0.0080   | -1.210    | 0.0360      | 0.0236 |
| <b>Y</b> | -0.160 | 2.370  | 0.043  | 0.0027   | -0.0520  | -0.0028  | -0.071    | -0.0009     | 0.0593 |
| <b>Z</b> | -0.086 | 0.096  | 1.214  | 0.0046   | -0.0011  | -0.0040  | 4.323     | -0.1607     | 0.0332 |

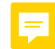

The magnetic field root mean square error for all axes is less than 60 nT, compared to the environmental noise of about  
 175 20 nT as reported in Table 1. The observed error is marginally larger the environmental noise floor of the instrument so there are still impacts to the observed inaccuracy beyond simple noise. However, the calibrated accuracy observed in this ground experiment is sufficient to meet the AERO-VISTA measurement requirement of 100 nT repeatability.

### 3.2 Discussion

The results of the full model calibration are generally consistent with the individual parameters fits from Section 2.3. The  
 180 diagonal components of the sensitivity matrix are near unity with the exception of  $S_{yy}$ , which can be explained by the sensitivity matrix temperature dependence, in particular the diagonal terms of  $K_S$ . The  $K_{Syy}$  term is also anomalously large

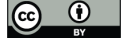

at -0.052 as compared to less than magnitude 0.01 for all other sensitivity terms. The data in this regression used units of  $\mu\text{T}$  for magnetic fields and degrees Celsius for temperature. Most, but not all, measurements were taken at room temperature of approximately 25 degrees Celsius, and using this temperature with the  $S_{yy}$  and  $K_{S_{yy}}$  terms finds a room temperature Y-axis sensitivity of 1.07, approximately unity as expected. This shows a ~~that~~ lack of characteristic calibration data can cause overfitting due to degeneracy of the fit to the available data. This will be mitigated on orbit by the use of more varied calibration data as was reported in Archer et al. (2015). The offset values themselves and their own temperature dependence are similar to the linear fit values from Section 2.3.

### 3.3 Future work

This calibration method is to be applied to on-orbit data collected by AERO and VISTA. AERO-VISTA will use global magnetic models as a calibration source at low latitudes where magnetic errors are at a minimum. Regression to this data will find the calibration parameters which will be used for calibration of the science data collected at high latitudes. During the operation of AERO-VISTA, the variation of calibration parameters orbit-to-orbit will be analyzed and from this we expect to characterize the calibration drift coherence time. On-orbit data may also allow for the evaluation of our calibration method to a higher fidelity since the magnetic measurements will not be affected by human-created magnetic noise as was observed during the data collection for this work. The spacecraft bus may also generate noise, but magnetic characterization of the bus during simulated spacecraft operation has found that bus-generated magnetic noise is less than about 20 nT RMS (Belsten, 2022).

#### 3.3.1 Calibration of interference

Calibration by regression can be extended to account for major sources of interference if the interfering vector varies linearly with some measurable parameter. One such example is the current through a solar charging circuit. The vector direction of magnetic error at the magnetometer generated by this loop will be constant because the loop geometry is constant, and the magnitude will vary linearly with current. Furthermore, AERO-VISTA (like most spacecraft) will collect housekeeping data on the current flowing through this loop. For every such interfering source current  $I_i$  there is a vector sensitivity direction  $\vec{D}_i$  such that the calibration equation Eq. (1) can be extended to Eq. (2) as discussed in Belsten (2022). The AERO-VISTA mission will attempt to improve magnetic sensing accuracy by including some housekeeping data in the regression using Eq. (2).

$$\vec{B}_{act} = [\mathbf{S} + \mathbf{K}_S * T] * \vec{B}_{meas} + [\vec{O} + \vec{K}_O * T] - \sum_i \vec{D}_i I_i \quad (2)$$

We have reported on the reduction of RMS error by use of our calibration equation and regression, but future work should compare the performance of this calibration with other methods of calibration. For example answering how much accuracy is lost by exclusion of some parameters of our model. This would allow for simplification of the data collection and calibration pipeline at the expense of some accuracy performance. On the other hand, more parameters could be added to the calibration



model, either based on physical reasoning as we have argued, or with a machine learning based approach such as discussed for example by Styp-Rekowski et al. (2022).

#### 4 Conclusions

215 This work demonstrated the calibration of a magnetic sensor implemented with the HMC1053 anisotropic magnetoresistive (AMR) magnetometer manufactured by Honeywell. The accuracy degradation caused by the following parameters were evaluated using ground based testing: constant offset and its temperature dependence, gain inaccuracy and its temperature dependence, cross-axis coupling and its temperature dependence, magnetometer hysteresis, and non-linearity. All of these effects except non-linearity and hysteresis need to be calibrated to achieve an accuracy of 100 nT as required for the  
 220 AERO-VISTA mission. A calibration model was proposed that parameterized the constant offset, gain uncertainty, cross-axis coupling, and the temperature dependence of all parameters. Regression was performed on this model using data collected during ground based testing and calibration parameters are reported in Table 7. The vector norm of the root mean square error of the magnetic data was reduced from  $4.3 \mu\text{T}$  to  $0.072 \mu\text{T}$ . This experiment has simultaneously validated the magnetometer design and calibration method for use on the AERO-VISTA mission. In orbit, AERO and VISTA will gather calibration  
 225 data at low latitudes using a global magnetic map as a reference source. The regression parameters will be used to achieve the desired accuracy in the science gathering region near Earth's aurora.

This work has built on previous work to achieve accurate performance from commercially available low SWaP AMR magnetometers. As found in previous works, it is important to calibrate for the gain, offset, and cross-axis coupling. The accuracy degradation due to hysteresis and non-linearity was found to be acceptable for the AERO-VISTA requirement  
 230 of 100 nT; however, the observed hysteresis error of about 50 nT could become a dominate source of inaccuracy in some applications. The design and calibration reported in this work can inform the selection of magnetometer technology for future SWaP constrained applications which seek magnetic resolution and repeatability of 10s of nT. The calibration model evaluated in this work can be used to improve magnetic sensing accuracy for other applications utilizing the same family of magnetometers, or for any other magnetometer that is similarly limited by calibration uncertainties in gain, offset, cross-axis  
 235 coupling, and the temperature dependencies of these parameters.

*Code and data availability.* The code used to perform regression and the data collected during this experiment is available at <https://github.com/MIT-STARLab/AV-MagEval-Data>. The code used to operate the MagEval magnetic sensing test circuit is available at [https://github.com/MIT-STARLab/AV\\_MagEval\\_Drivers](https://github.com/MIT-STARLab/AV_MagEval_Drivers)

*Author contributions.* NB designed the experiment, performed analysis, data visualization, and prepared the manuscript. MK, RM, FDL, and KC provided supervision to NB. MK and FDL conceptualized the research problem. CP and KA assisted NB in experiment procedure  
 240 preparation and manuscript editing.

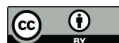

*Competing interests.* The contact author has declared that none of the authors has any competing interests.

245 *Acknowledgements.* The AERO project is supported by NASA grant 80NSSC18K1677 in the NASA Heliophysics Technology and Instrument Development for Science (H-TiDeS) program. The VISTA project is supported by NASA grant 80NSSC19K0617 from the NASA HTiDeS program. The author thanks Jay Shah, Eduardo Lima, and Benjamin Weiss from MIT's Paleomagnetism Laboratory for providing access to their magnetic testing facilities. The authors acknowledge other Auxiliary Sensor Package (ASP) team members including Luc Cote, Cici Mao, Dylan Goff, and Alvar Saenz-Otero for their related contributions to the ASP system.

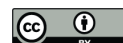

## References

- Albertson, V. D. and Van Baelen, J. A.: Electric and Magnetic Fields at the Earth's Surface Due to Auroral Currents, IEEE Transactions on Power Apparatus and Systems, PAS-89, 578–584, <https://doi.org/10.1109/TPAS.1970.292604>, conference Name: IEEE Transactions on Power Apparatus and Systems, 1970.
- Alken, P., Thébaud, E., Beggan, C. D., Amit, H., Aubert, J., Baerenzung, J., Bondar, T. N., Brown, W. J., Califf, S., Chambodut, A., Chulliat, A., Cox, G. A., Finlay, C. C., Fournier, A., Gillet, N., Grayver, A., Hammer, M. D., Holschneider, M., Huder, L., Hulot, G., Jager, T., Kloss, C., Korte, M., Kuang, W., Kuvshinov, A., Langlais, B., Léger, J.-M., Lesur, V., Livermore, P. W., Lowes, F. J., Macmillan, S., Magnes, W., Manda, M., Marsal, S., Matzka, J., Metman, M. C., Minami, T., Morschhauser, A., Mound, J. E., Nair, M., Nakano, S., Olsen, N., Pavón-Carrasco, F. J., Petrov, V. G., Ropp, G., Rother, M., Sabaka, T. J., Sanchez, S., Saturnino, D., Schnepf, N. R., Shen, X., Stolle, C., Tangborn, A., Toffner-Clausen, L., Toh, H., Torta, J. M., Varner, J., Vervelidou, F., Vigneron, P., Wardinski, I., Wicht, J., Woods, A., Yang, Y., Zeren, Z., and Zhou, B.: International Geomagnetic Reference Field: the thirteenth generation, *Earth, Planets and Space*, 73, 49, <https://doi.org/10.1186/s40623-020-01288-x>, 2021.
- Archer, M. O., Horbury, T. S., Brown, P., Eastwood, J. P., Oddy, T. M., Whiteside, B. J., and Sample, J. G.: The MAGIC of CINEMA: first in-flight science results from a miniaturised anisotropic magnetoresistive magnetometer, *Annales Geophysicae*, 33, 725–735, <https://doi.org/10.5194/angeo-33-725-2015>, publisher: Copernicus GmbH, 2015.
- Belsten, N.: Magnetic Cleanliness, Sensing, and Calibration for CubeSats, Thesis, Massachusetts Institute of Technology, <https://dspace.mit.edu/handle/1721.1/143167>, accepted: 2022-06-15T13:00:52Z, 2022.
- Belsten, N., Payne, C., Masterson, R., Cahoy, K., Knapp, M., Gedenk, T., Lind, F., and Erickson, P.: Design and Performance of the AERO-VISTA Magnetometer, Small Satellite Conference, <https://digitalcommons.usu.edu/smallsat/2022/all2022/58>, 2022.
- Chulliat, A., Alken, P., and Nair, M.: The US/UK World Magnetic Model for 2020-2025: Technical Report, <https://doi.org/10.25923/YTK1-YX35>, publisher: National Centers for Environmental Information (U.S.); British Geological Survey, 2020.
- Erickson, P. J., Geoffrey, C., Hecht, M., Knapp, M., Lind, F., Volz, R., LaBelle, J., Robey, F., Cahoy, K., Malphrus, B., Vierinen, J., and Weatherwax, A.: AERO: Auroral Emissions Radio Observer, Tech. rep., MIT Lincoln Laboratory Lexington United States, <https://apps.dtic.mil/sti/citations/AD1088037>, section: Technical Reports, 2018.
- Gu, H., Zhang, X., Wei, H., Huang, Y., Wei, S., and Guo, Z.: An overview of the magnetoresistance phenomenon in molecular systems, *Chemical Society Reviews*, 42, 5907, <https://doi.org/10.1039/c3cs60074b>, 2013.
- Jr, P. D. L. and Lowman, P. D.: Exploring Space, Exploring Earth: New Understanding of the Earth from Space Research, Cambridge University Press, google-Books-ID: BAcG2Z4F41AC, 2002.
- Lind, F., Erickson, P., Hecht, M., Knapp, M., Crew, G., Volz, R., Swoboda, J., Robey, F., Silver, M., Fenn, A., Malphrus, B., and Cahoy, K.: AERO & VISTA: Demonstrating HF Radio Interferometry with Vector Sensors, Small Satellite Conference, <https://digitalcommons.usu.edu/smallsat/2019/all2019/96>, 2019.
- Liu, Y., Liu, K.-P., Li, Y.-L., Pan, Q., and Zhang, J.: A ground testing system for magnetic-only ADCS of nano-satellites, in: 2016 IEEE Chinese Guidance, Navigation and Control Conference (CGNCC), pp. 1644–1647, <https://doi.org/10.1109/CGNCC.2016.7829037>, 2016.
- Nicollier, C. and Bonnet, R.-M.: Our Space Environment, Opportunities, Stakes and Dangers, journal Abbreviation: Our Space Environment, Opportunities, Stakes and Dangers Pages: 205 Publication Title: Our Space Environment, Opportunities, Stakes and Dangers, 2016.
- Parham, J. B., Kromis, M., Einhorn, D., Teng, P., Levin, H., and Semeter, J.: Networked Small Satellite Magnetometers for Auroral Plasma Science, *Journal of Small Satellites*, 8, 801–814, 2019.

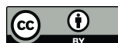

- 285 Ripka, P., Vopálenský, M., Platil, A., Döscher, M., Lenssen, K. M. H., and Hauser, H.: AMR magnetometer, *Journal of Magnetism and Magnetic Materials*, 254-255, 639–641, [https://doi.org/10.1016/S0304-8853\(02\)00927-7](https://doi.org/10.1016/S0304-8853(02)00927-7), 2003.
- Sonett, C. P., Colburn, D. S., and Currie, R. G.: The intrinsic magnetic field of the Moon, *Journal of Geophysical Research* (1896-1977), 72, 5503–5507, <https://doi.org/10.1029/JZ072i021p05503>, \_eprint: <https://onlinelibrary.wiley.com/doi/pdf/10.1029/JZ072i021p05503>, 1967.
- 290 Styp-Rekowski, K., Michaelis, I., Stolle, C., Baerenzung, J., Korte, M., and Kao, O.: Machine learning-based calibration of the GOCE satellite platform magnetometers, *Earth, Planets and Space*, 74, 138, <https://doi.org/10.1186/s40623-022-01695-2>, 2022.
